# Supplementary material for: Disposable Polyaniline/m-Phenylenediamine-Based Electrochemical Lactate Biosensor for Early Sepsis Diagnosis
Source: MDPI journal article supplement (doi:10.3390/polym16040473), 2024-02-08
Supplement: s1 [file s1]

## Supplementary data

### Disposable Polyaniline/*m*-Phenylenediamine-Based Electrochemical Lactate Biosensor for Early Sepsis Diagnosis

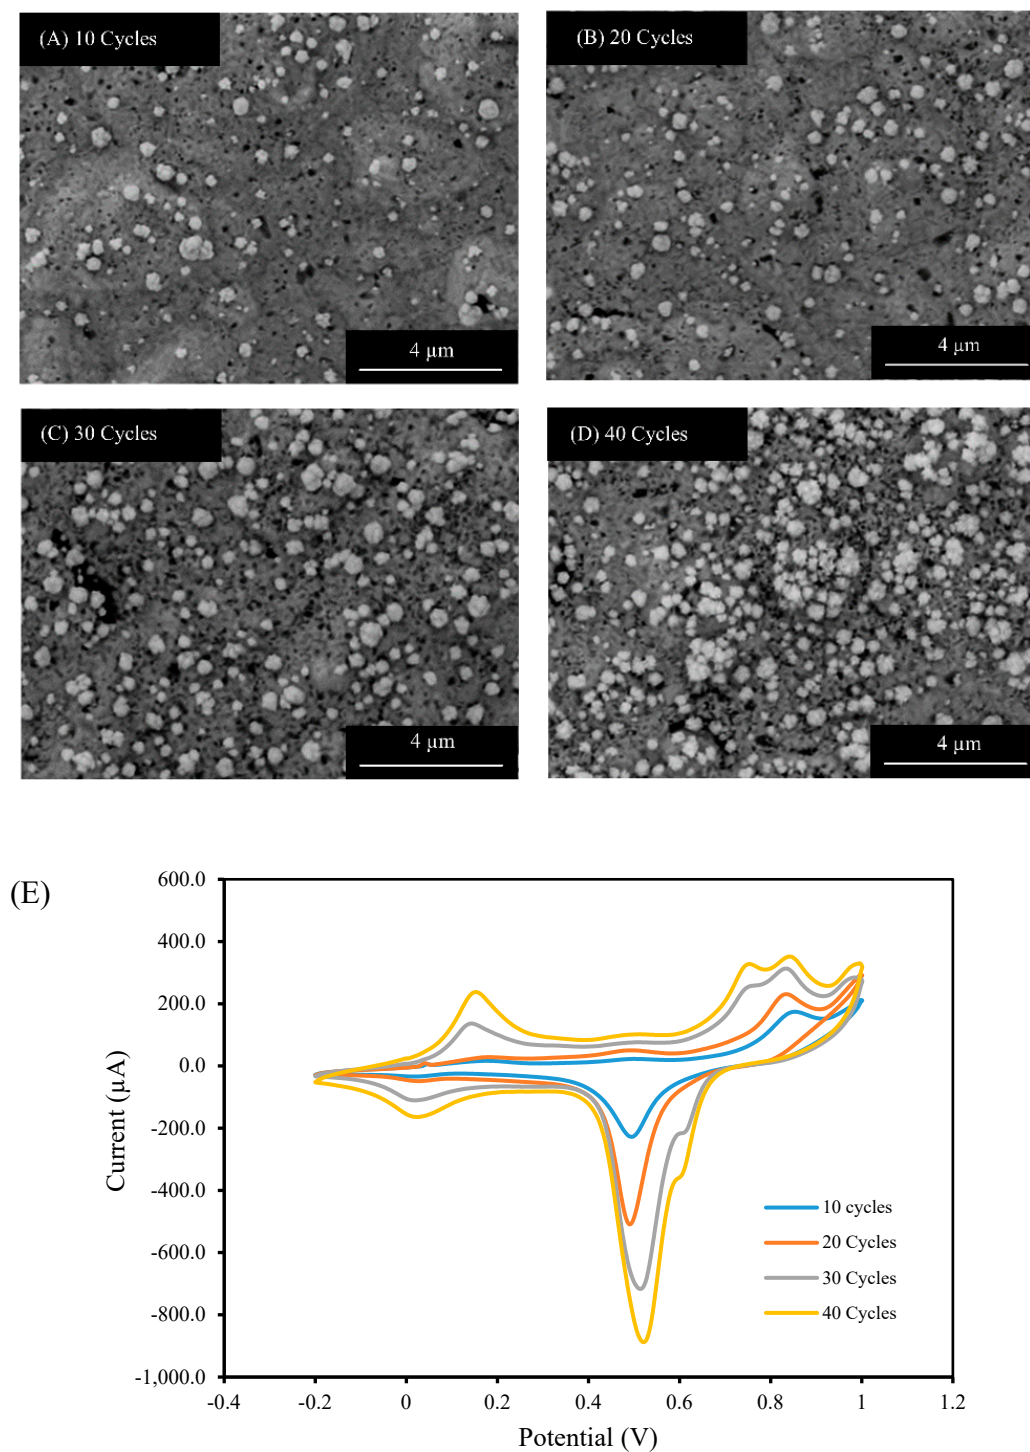

**Figure S1.** SEM images of PANI electropolymerization at different number of scans: (A) 10 cycles (B) 20 cycles (C) 30 cycles, and (D) 40 cycles. (E) Cyclic voltammograms of PANI electropolymerization at four different number of scans

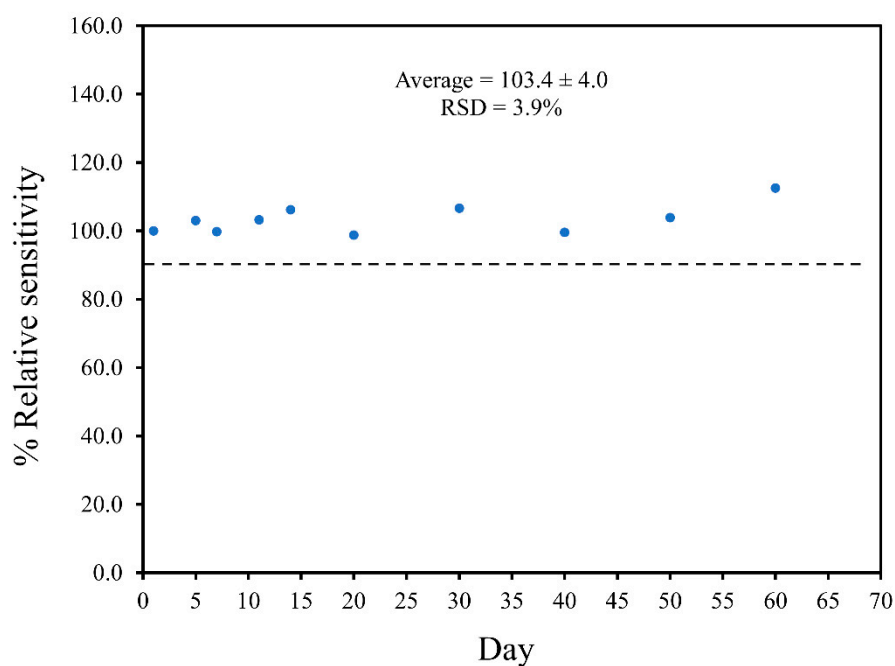

**Figure S2.** The storage stability testing for the detection of 0.40 - 3.0 mmol L<sup>-1</sup> lactate in 0.1 mmol L<sup>-1</sup> PBS pH 7.4 using amperometry.

**Table S1.** The recovery study was performed using the standard addition method.

| Spiked<br>concentration<br>(mM) | Sample 1                                         |                             | Sample 2                                         |                             | Sample 3                                         |                             |
|---------------------------------|--------------------------------------------------|-----------------------------|--------------------------------------------------|-----------------------------|--------------------------------------------------|-----------------------------|
|                                 | Measurement<br>Concentration (mM)<br>± S.D (n=3) | Recovery (%)<br>± S.D (n=3) | Measurement<br>Concentration (mM)<br>± S.D (n=3) | Recovery (%)<br>± S.D (n=3) | Measurement<br>Concentration (mM)<br>± S.D (n=3) | Recovery (%)<br>± S.D (n=3) |
| 0.40                            | 0.41±0.06                                        | 103.6±3.5                   | 0.38±0.07                                        | 93.9±1.49                   | 0.42±0.16                                        | 104.5±3.68                  |
| 0.60                            | 0.56±0.05                                        | 93.2±3.7                    | 0.6±0.09                                         | 99.7±0.03                   | 0.57±0.18                                        | 95.4±4.71                   |
| 1.0                             | 1.06±0.14                                        | 106.3±4.6                   | 0.97±0.08                                        | 97.0±2.77                   | 0.99±0.11                                        | 99.2±2.62                   |
| 2.0                             | 2.01±0.09                                        | 100.4±4.6                   | 2.13±0.10                                        | 106.4±1.37                  | 2.03±0.07                                        | 101.7±3.48                  |
| 3.0                             | 2.99±0.29                                        | 99.5±6.4                    | 2.93±0.25                                        | 97.6±0.89                   | 2.98±0.06                                        | 99.4±2.55                   |

Sample 1:

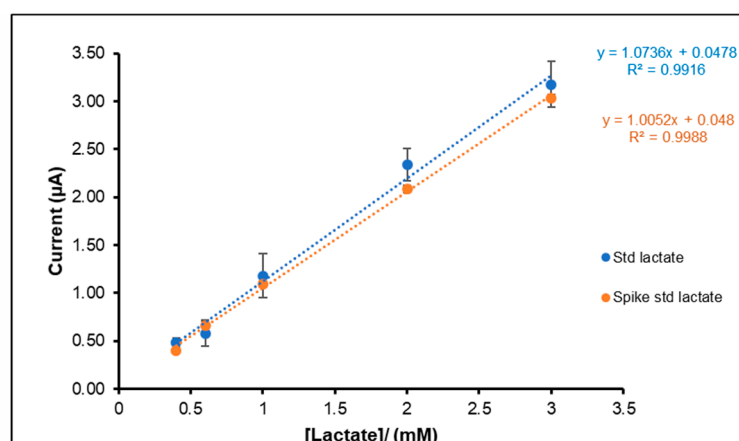

Sample 2:

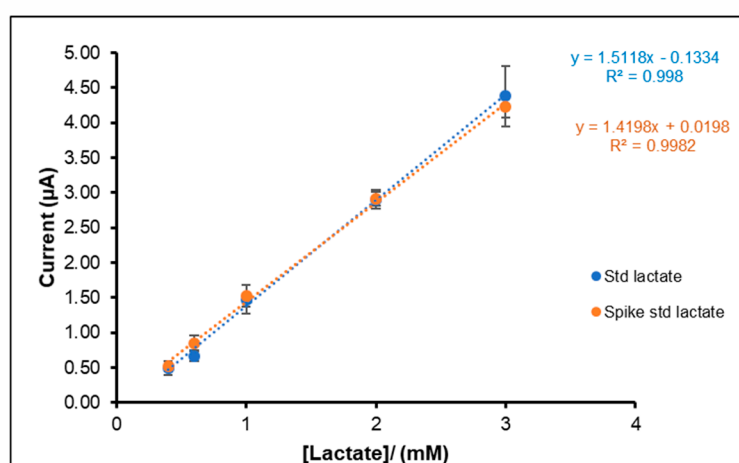

Sample 3:

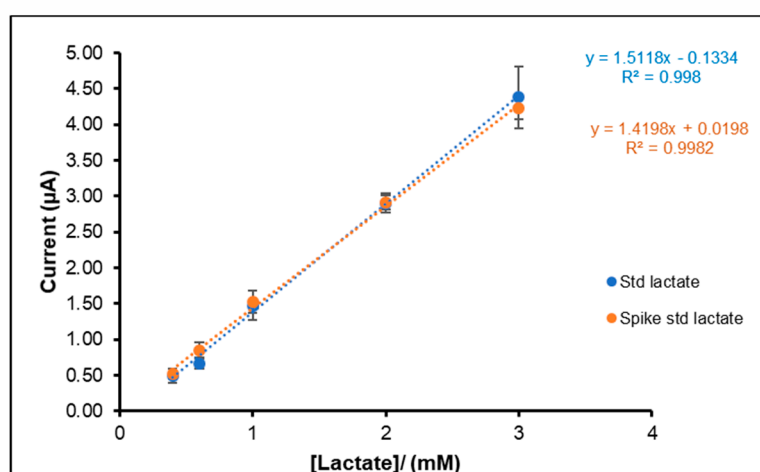

**Figure S3:** Comparison of the calibration curves between the standard lactate solution and the spiked lactate in three blood samples.
